# Supplementary material for: Bent pinkies: Quantifying fifth finger clinodactyly in a sample of U.S. adults
Source: PLoS One. 2022 Jul 20;17(7):e0271734. doi: 10.1371/journal.pone.0271734 (PMC9299322; doi:10.1371/journal.pone.0271734)
Supplement: S1 File — (XLSX) [file pone.0271734.s001.xlsx]

## Sheet: Dataset
Anonymized 1D	Sex	AgeAtExam	Race	Ethnicity	Weight_kg	Height_cm	Right Curvature	Left Curvature
1001	2	18.7	1	0	49.4	160	1.49863	0.449584
1002	2	19.9	1	0	85.7	165	1.92147	5.53562
1003	2	19.9	1	0	54.4	165	0.0236808	2.82659
1004	2	20	1	0	55.8	155	4.40095	6.3921
1005	2	20.2	2	0	76.7	165	2.47415	3.42995
1006	2	20.3	1	0	60.3	152	3.1468	6.12695
1007	2	20.4	1	0	50.3	160	1.90899	1.90899
1008	2	20.7	1	0	65.3	168	2.53544	1.77533
1009	2	20.8	1	0	102.1	168	2.54724	5.45168
1010	2	21	1	0	70.3	160	1.8949	1.72537
1011	2	21.2	1	0	88.5	163		2.45768
1012	2	21.2	1	0	58.5	155	3.99209	4.58844
1013	2	21.3	1	0	78	173	2.02187	1.48384
1014	2	21.5	1	0	62.1	163	0.976192	1.98915
1015	2	21.6	1	0	85.7	157	1.39593	5.49853
1016	2	21.7	1	0	78.9	170	0.955534	5.77498
1017	2	21.7	1	0	73.5	170	2.2926	2.55452
1018	2	22.1	1	0	59.4	160		5.32217
1019	2	22.1	1	0	62.6	168	0.356403	1.25819
1020	2	22.1	1	0	56.7	160	0.664006	1.5108
1021	2	22.3	1	0	83.9	157	2.75714	3.56885
1022	2	22.5	1	0	79.4	165	1.9264	2.03659
1023	2	22.5	1	0	122.9	170	4.16421	4.79618
1024	2	22.7	1	0	57.2	173	2.33361	6.82246
1025	2	22.7	1	0	107.5	173	4.32644	8.94432
1026	2	22.7	1	0	73	165	1.90964	1.38036
1027	2	22.8	1	0	112.9	152	1.2462	4.63743
1028	2	22.8	1	1	120.2	178	0.902515	3.95435
1029	2	22.9	1	0	103.9	157	4.34428	4.98426
1030	2	22.9	1	1	54.4	160	2.59593	1.77056
1031	2	23.1	1	0	45.8	150	2.21374	2.96787
1032	2	23.1	1	0	95.7	168	2.83265	5.22442
1033	2	23.2	1	0	93	165	1.19575	4.44163
1034	2	23.3	1	0	97.1	157	3.52804	2.87521
1035	2	23.4	1	0	48.1	168	4.19767	2.48058
1036	2	23.4	1	0	44.9	157	0.781454	0.756252
1037	2	23.4	2	0	104.3	163	6.36671	3.85383
1038	2	23.5	1	0	73.9	173	0.466469	0.399827
1039	2	23.6	1	0	59.9	163	3.02866	3.60634
1040	2	23.6	1	0	56.2	157	5.69914	4.30654
1041	2	23.6	1	0	123.8	168	4.0678	9.85581
1042	2	23.6	1	0	77.1	168	2.1249	6.46503
1043	2	23.6	2	0	60.3	160	4.15778	4.62022
1044	2	23.8	2	0	86.2	170	3.08121	0.816616
1045	2	23.9	1	0	59.9	160	3.83129	7.21703
1046	2	24	1	0	59.9	163	1.50977	2.88659
1047	2	24	1	0	73	160	2.83134	3.16034
1048	2	24	1	0	85.7	165	1.08005	1.43527
1049	2	24.1	1	0	67.6	168	3.02059	5.85606
1050	2	24.1	1	0	87.5	160	3.54679	6.97257
1051	2	24.1	1	0	59	165	2.50789	3.22517
1052	2	24.1	1	0	87.1	157	2.14908	5.85621
1053	2	24.2	1	0	68	160	5.54431	3.47406
1054	2	24.2	1	0	65.3	160	0.700482	5.83861
1055	2	24.3	1	0	73.9	165	0.856915	5.40284
1056	2	24.3	1	0	59.9	165	1.77575	3.1036
1057	2	24.4	1	0	61.2	163	1.15034	7.15259
1058	2	24.4	1	1	88	165	2.99872	5.15244
1059	2	24.5	1	0	77.6	163	1.83947	3.12276
1060	2	24.6	1	0	62.1	163	5.82241	4.49563
1061	2	24.6	2	-8888	85.3	170	2.91255	2.08787
1062	2	24.8	1	0	63	168	2.94366	4.15254
1063	2	25	1	0	69.4	175	1.38289	3.09127
1064	2	25.1	1	0	127.9	165	1.22645	3.82566
1065	2	25.3	1	0	64.4	155	1.26376	3.78943
1066	2	25.3	1	0	79.4	160	0.48005	2.81514
1067	2	25.4	1	0	69.9	163	0.524016	2.96744
1068	2	25.4	1	0	81.2	163	1.02148	3.31577
1069	2	25.4	2	0	119.7	168	3.46524	4.03098
1070	2	25.5	1	0	50.3	157	3.10287	2.88051
1071	2	25.5	1	0	56.7	163	0.680084	2.14904
1072	2	25.5	1	0	62.6	170		0.261904
1073	2	25.6	1	0	69.4	168	1.43703	3.60483
1074	2	25.6	1	0	99.3	165	2.75359	0.586118
1075	2	25.6	1	0	58.5	170	3.26771	5.66131
1076	2	25.7	1	0	64	-9999	0.709805	4.11557
1077	2	25.8	1	0	71.7	163	0.439018	3.83606
1078	2	25.9	1	0	62.6	165	2.83135	6.05883
1079	2	26	1	0	61.2	165	0.322301	3.05809
1080	2	26	1	0	58.1	163	2.49038	5.0992
1081	2	26.1	1	0	68	165	2.63853	6.36112
1082	2	26.1	1	0	65.8	168	3.32782	2.55403
1083	2	26.2	1	0	67.6	168	4.27948	3.31541
1084	2	26.2	1	0	114.3	165	2.9167	3.80004
1085	2	26.3	1	0	56.2	160	0.731251	3.12616
1086	2	26.3	1	0	67.1	175	1.64472	4.41639
1087	2	26.3	1	0	72.1	160	2.252	4.92767
1088	2	26.4	1	0	68	168	6.46469	5.27652
1089	2	26.5	1	0	50.3	157	2.07822	1.83074
1090	2	26.7	1	0	61.2	168	3.02279	3.31203
1091	2	26.7	1	0	94.3	165	2.18124	3.04579
1092	2	26.7	1	0	79.4	170	5.04153	4.58409
1093	2	26.8	1	0	89.8	173	2.73153	2.5042
1094	2	26.8	1	1	91.6	168	1.701	1.54831
1095	2	26.8	1	0	64.4	160	4.51013	3.97964
1096	2	26.8	1	0	70.8	165	0.953558	3.32552
1097	2	26.8	1	0	59.9	170	1.3531
1098	2	26.9	1	0	76.7	168	3.33777	3.91129
1099	2	26.9	1	0	68.5	-9999	3.83227	2.53061
1100	2	26.9	1	0	102.1	155	4.13163	5.7942
1101	2	27	1	0	74.8	163	0.965199	8.80638
1102	2	27	1	0	101.6	157	1.40058	4.50889
1103	2	27	1	0	62.1	170	2.00562	3.61674
1104	2	27.1	1	0	83	163	0.307788	2.86396
1105	2	27.1	1	0	79.8	163	1.91704	2.45146
1106	2	27.2	1	0	79.8	170	0.0850007	4.1427
1107	2	27.2	1	0	57.2	160	2.89053	4.97163
1108	2	27.2	1	0	62.6	163	1.22807	5.98385
1109	2	27.2	2	0	61.2	168	4.94427	6.73585
1110	2	27.3	1	0	54.4	163	3.72393	3.61831
1111	2	27.3	1	0	76.2	173	3.62567	6.33326
1112	2	27.4	1	0	60.3	170	4.04073	7.12688
1113	2	27.5	1	0	48.1	165	3.55818	5.28772
1114	2	27.5	1	0	87.1	163	1.00538	1.2839
1115	2	27.5	1	0	53.5	170	1.40437	3.69099
1116	2	27.5	1	0	55.3	155	4.41608	6.05077
1117	2	27.5	1	0	69.4	165	3.0831	6.47789
1118	2	27.5	1	0	51.7	160	2.24726	5.01148
1119	2	27.5	1	0	61.7	160	0.0791531	3.41913
1120	2	27.5	1	0	128.4	168	2.92093	4.61205
1121	2	27.7	1	0	102.1	170	2.76316	5.02943
1122	2	27.7	1	0	144.7	175	0.326241	3.04793
1123	2	27.7	1	0	99.8	155	1.95869	5.58262
1124	2	27.7	1	0	60.8	155	0.0983062	0.666121
1125	2	27.7	1	0	87.5	168	0.879305	1.69787
1126	2	27.7	1 5	0	110.2	160	2.98365	2.2944
1127	2	27.8	1	0	63.5	175	0.885947	2.40627
1128	2	27.8	1	0	78.5	160	1.35008	1.62894
1129	2	27.9	1	0	77.6	168	3.37171	4.59892
1130	2	27.9	1	0	61.2	155	5.76134	9.21361
1131	2	27.9	2	0	161.9	165	5.87934	4.00312
1132	2	28	1	0	54.9	170	2.45592	4.93304
1133	2	28	1	0	76.2	163	5.66081	3.04356
1134	2	28.1	1	0	75.3	173	2.22432	3.09005
1135	2	28.1	1	0	72.6	168	1.32498	6.05479
1136	2	28.1	1	0	83.5	165	2.67155	6.34392
1137	2	28.1	1	0	67.6	178	2.57977	5.91176
1138	2	28.1	1	0	61.2	160	4.97466	5.98596
1139	2	28.2	1	0	65.3	160	0.384486	2.43843
1140	2	28.2	1	1	88.9	163	1.02457	2.37957
1141	2	28.2	1	0	83.9	163	2.30915	5.29927
1142	2	28.2	1	0	73.9	160	3.27189	4.63672
1143	2	28.2	1	0	59	170	1.28875	2.92734
1144	2	28.2	1	0	69.4	163	2.76967	0.634482
1145	2	28.2	1	0	60.8	160	5.64224	4.06346
1146	2	28.2	1	0	70.8	155	6.14257	5.4066
1147	2	28.3	1	0	118.4	165	0.427966	3.44884
1148	2	28.3	1	0	77.6	170	3.72178	2.4702
1149	2	28.3	1	0	61.7	163	2.57008	2.83076
1150	2	28.3	1	0	60.8	163	2.40701	3.66718
1151	2	28.3	1	0	69.9	165	3.35762	4.08078
1152	2	28.3	1	0	63.5	168	4.07488	3.75957
1153	2	28.4	1	0	98.4	165	0.502105	3.31407
1154	2	28.4	1	0	69.9	163	4.28072	7.56758
1155	2	28.5	1 5	0	75.7	157	1.47532	1.65633
1156	2	28.5	1	0	71.7	168	6.14041	5.26328
1157	2	28.5	1	0	73	165	5.77828	7.54277
1158	2	28.5	1	0	52.6	163	0.420009	3.82767
1159	2	28.6	1	0	91.2	165	1.811	7.12575
1160	2	28.6	1	0	68.5	160	7.07149	6.54618
1161	2	28.6	1	0	59.4	165	3.85658	3.34333
1162	2	28.7	1	0	70.8	170	1.67545	2.72882
1163	2	28.7	1	0	63.5	173	0.998709	1.8006
1164	2	28.7	1	0	64	160	0.617971	5.08054
1165	2	28.8	6	1	71.7	168	0.532898	2.80262
1166	2	28.8	1	0	69.4	155	1.93995	6.07694
1167	2	28.9	1	0	91.2	163	1.60149	5.79331
1168	2	28.9	1	1	109.3	168	0.135451	2.44318
1169	2	28.9	1	0	71.2	160	1.77286	5.23421
1170	2	28.9	1	0	68	165	3.75353	5.72262
1171	2	28.9	1	0	63.5	170	1.89442	2.19989
1172	2	29	1	0	71.7	170	4.85546	5.72781
1173	2	29	1	0	104.8	170	0.911197	4.3075
1174	2	29	1	0	73.9	173	1.99657	3.15925
1175	2	29	1	0	64	168	1.7852	3.10642
1176	2	29	1	0	94.3	165	1.78153	2.80835
1177	2	29	1	0	85.7	178	2.31755	3.79334
1178	2	29.1	1	0	92.5	157	2.97754	3.84959
1179	2	29.1	1	0	84.8	168	9.30675	9.95283
1180	2	29.1	1	0	46.3	157	1.13837	7.40835
1181	2	29.1	1	0	77.6	160	3.93905	5.71468
1182	2	29.1	1	0	86.6	163	3.16977	4.13059
1183	2	29.2	1	0	80.7	170	2.68591	4.58533
1184	2	29.3	1	0	79.8	160	0.264398	5.11956
1185	2	29.3	1	0	56.7	157	0.661586	3.30905
1186	2	29.3	1	0	73	165	3.97331	7.97807
1187	2	29.3	1	0	80.3	163	0.875883	2.07475
1188	2	29.3	1	0	68.5	165	2.82051	1.27866
1189	2	29.3	1	0	68.5	168	2.09854	4.1377
1190	2	29.4	1	0	70.3	163	2.72647	5.23924
1191	2	29.4	1	0	49	155	1.13326	4.5231
1192	2	29.4	1	0	103.4	180	2.69983	3.8783
1193	2	29.4	1	0	84.8	170	4.43366	5.48512
1194	2	29.4	1	0	64.4	160	1.18914	4.19139
1195	2	29.4	1	0	63	170	1.99108	2.44179
1196	2	29.5	1	0	71.7	165	5.31919	6.09769
1197	2	29.5	1	0	47.6	157	2.72975	5.98473
1198	2	29.5	1	0	61.2	160	2.8832	5.09276
1199	2	29.5	1	0	68	168	0.0570208	0.79866
1200	2	29.6	1	0	59.4	157	3.49747	4.65891
1201	2	29.6	1	0	66.7	183	3.15035	4.07798
1202	2	29.6	1	0	77.6	163	4.20455	3.08244
1203	2	29.6	1	0	71.7	160	1.62058	2.33976
1204	2	29.6	1	0	66.7	165	3.02068	3.08664
1205	2	29.6	1	0	67.6	168	4.46078	4.7781
1206	2	29.7	1	0	76.2	168	1.3848	5.02212
1207	2	29.7	1	0	49.4	157	0.613712	2.63877
1208	2	29.8	1	0	69.9	155	4.49249	5.09327
1209	2	29.8	1	0	88.5	160	3.71369	5.01472
1210	2	29.9	1	0	64.9	168	3.4391	4.32639
1211	2	29.9	1	0	84.4	175	1.41759	1.61125
1212	2	29.9	1	0	66.2	173	3.49051	3.47014
1213	2	29.9	1	0	98	165	2.5773	2.62775
1214	2	29.9	1	0	68.5	168	6.2921	7.90595
1215	2	29.9	1	0	71.2	165	2.33822	5.3509
1216	2	29.9	1	0	98.9	170	2.76003	3.26667
1217	2	29.9	1	0	65.3	168	4.69793	7.61696
1218	2	30	1	0	55.8	163	3.21866	5.00575
1219	2	30	1	1	65.3	163	1.73379	1.87228
1220	2	30	1	0	67.6	168	3.44117	4.53029
1221	2	30	1	0	69.9	163	2.24195	1.82817
1222	2	30	1	0	92.5	170	2.63159	5.45228
1223	2	30.1	1	0	53.1	165	2.38412	5.4181
1224	2	30.1	1	0	72.6	157	3.14217	6.67786
1225	2	30.2	1	0	60.8	175	1.07185	5.29539
1226	2	30.2	1	0	55.8	173	3.65782	2.60478
1227	2	30.2	1	0	94.8	168	0.176229	1.84432
1228	2	30.2	1	0	70.3	168	1.4905	4.19461
1229	2	30.2	1	0	83	163	3.8644	7.31804
1230	2	30.3	1	0	54.9	163	4.17562	4.46106
1231	2	30.3	1	0	103	170	5.86685	5.42578
1232	2	30.3	1	0	99.3	163	1.71423	1.49919
1233	2	30.3	1	0	78.5	165	0.602185	2.08044
1234	2	30.4	1	0	73.5	173	2.97876	4.70062
1235	2	30.4	1	0	89.4	173	0.825632
1236	2	30.4	1	0	80.7	165	7.3236	7.62352
1237	2	30.4	1	0	63.5	168	3.55995	4.16142
1238	2	30.5	1	0	108.4	168	1.01436	4.63734
1239	2	30.5	1	0	70.8	165	3.6514	4.43274
1240	2	30.5	1	0	67.6	160		2.53903
1241	2	30.5	1	0	71.7	173	2.64501	4.69514
1242	2	30.5	1	0	54.4	150	6.42969	11.9109
1243	2	30.6	1	0	65.8	147	4.15381	3.92236
1244	2	30.6	1	0	57.6	168	2.98271	7.5919
1245	2	30.6	2	0	90.3	160	4.21153	3.97239
1246	2	30.7	1	0	82.1	163	1.39198	2.62123
1247	2	30.7	1	0	57.2	168	1.48195	2.806
1248	2	30.7	1	0	89.8	170	1.87681	3.58538
1249	2	30.7	1	0	68.9	165	3.26363	5.52516
1250	2	30.7	1	0	64.4	168	0.261686	2.54657
1251	2	30.8	1	1	80.3	155	0.434396	3.88045
1252	2	30.8	1	0	107.5	163	3.3885	4.8186
1253	2	30.8	1	0	62.1	150	5.29411	5.88633
1254	2	30.8	1	0	67.1	173	5.40036	3.93019
1255	2	30.8	1	0	61.7	175	0.602463	1.9706
1256	2	30.8	1	0	70.3	157	4.41515	5.34719
1257	2	30.8	1	0	72.1	165	0.326705
1258	2	30.9	1	0	66.7	165	2.97081	4.86749
1259	2	30.9	1	0	97.1	168	4.17179	5.19292
1260	2	30.9	1	0	70.3	165	1.65041	3.36767
1261	2	30.9	1	0	72.1	170	1.62688	3.68646
1262	2	30.9	1	0	70.3	165	1.99214	3.64321
1263	2	30.9	1	0	96.6	168	5.70957	5.45937
1264	2	30.9	1	0	122.5	163	2.20864	3.69863
1265	2	31	1	0	99.8	180	1.1951	1.48344
1266	2	31	1	0	48.5	168	3.48014	6.41596
1267	2	31	1	0	78.9	175	1.97411	2.49481
1268	2	31	1	0	78.5	163	0.100348	6.48111
1269	2	31	1	0	91.2	183	1.4316	5.1603
1270	2	31.1	1	0	57.2	155	1.54481	2.75708
1271	2	31.1	1	0	77.6	163	3.10154	5.34263
1272	2	31.1	1	0	65.8	155	4.1008	4.94115
1273	2	31.2	1	0	52.2	163	3.93652	4.51522
1274	2	31.2	1	0	68.5	163	3.86636	2.15247
1275	2	31.3	1	0	79.4	170	0.449731	6.91776
1276	2	31.3	1	0	53.5	170	2.59732	5.12718
1277	2	31.3	1	0	88.9	170	1.31364	0.930319
1278	2	31.3	1	0	72.1	165	0.605594	5.01454
1279	2	31.4	1	0	52.2	170	1.02198	2.80601
1280	2	31.4	1	0	50.8	157	3.27525	6.29044
1281	2	31.4	1	0	74.4	160	2.44184	3.36618
1282	2	31.4	1	0	75.7	168	1.20817	7.47092
1283	2	31.4	1	0	87.5	173	0.100372	4.64796
1284	2	31.4	1	0	79.8	163	1.00626	3.58828
1285	2	31.5	1	0	58.5	168		2.74672
1286	2	31.5	1	0	57.2	155	2.63865	3.95105
1287	2	31.5	1	0	95.3	160	1.0999	2.36141
1288	2	31.5	1	0	53.1	157	5.96778	6.91023
1289	2	31.5	1	0	68	178	1.24953
1290	2	31.5	1	0	65.3	165	6.26132	7.1274
1291	2	31.6	1	0	56.7	163	2.58826	6.28565
1292	2	31.6	1	0	70.3	160	4.13294	7.14307
1293	2	31.6	1	0	76.2	168	2.25037	3.70366
1294	2	31.6	1	0	99.3	165	1.51691	2.67679
1295	2	31.6	1	0	94.8	168	3.58435	3.65538
1296	2	31.6	1	0	86.2	173	4.16834	2.30296
1297	2	31.7	1	0	185.5	178	4.47303	1.51874
1298	2	31.7	1	0	64.9	163	2.95392	6.23875
1299	2	31.7	1	0	68.5	168	2.32654	0.508681
1300	2	31.7	1	0	73.9	175	2.65957	2.48177
1301	2	31.7	1	0	59.4	157	3.27823	5.61021
1302	2	31.7	1	0	73	173	3.75574	5.22683
1303	2	31.7	2	0	52.6	163	5.58478	5.2045
1304	2	31.8	1	0	67.6	170	3.87661	6.34793
1305	2	31.8	1	0	61.7	168	0.109218	3.57691
1306	2	31.9	1	0	58.1	165	4.67157	5.70529
1307	2	31.9	1	0	64	168	1.79912	3.19425
1308	2	32	1	0	99.3	168	3.54214	5.97728
1309	2	32	1	0	64.4	165	0.645465	3.42243
1310	2	32	1	0	59.4	165	5.78289	8.72637
1311	2	32	1	1	68.9	163		5.10642
1312	2	32	1	0	71.2	165	4.93697	4.05686
1313	2	32	1	0	78.9	168	2.31134	4.97871
1314	2	32	1	1	77.6	160	3.3119	3.56212
1315	2	32	1	0	69.9	160	4.07162	6.85962
1316	2	32.1	1	0	69.9	170	1.91408	1.76267
1317	2	32.1	1	0	58.1	165	1.64664	0.532595
1318	2	32.1	1	0	80.3	168	1.99183	3.07751
1319	2	32.1	1	0	60.8	170	5.28805	8.1615
1320	2	32.1	1	0	70.8	168	3.15989	3.37757
1321	2	32.1	1	0	66.2	160	1.58223	4.74815
1322	2	32.1	1	0	83.5	178	2.8748	5.80431
1323	2	32.1	1	0	80.3	160	3.07757	4.84513
1324	2	32.2	1	0	75.3	168	5.26935	6.11834
1325	2	32.2	1	0	50.8	147	1.80991	3.77854
1326	2	32.2	1	1	67.6	168	3.36359	3.99285
1327	2	32.2	1	0	158.3	163	2.38084	4.39119
1328	2	32.3	1	0	59.4	173	2.42383	2.8859
1329	2	32.3	1	0	54.9	157	5.18384	8.29875
1330	2	32.3	1	0	85.7	165	1.5169	4.23426
1331	2	32.3	1	0	52.6	160	2.05178	4.30933
1332	2	32.4	1	1	62.6	155	2.22857	5.15662
1333	2	32.4	1	0	86.2	152	1.26138	4.13573
1334	2	32.4	1	0	68.9	173	3.54247	6.78972
1335	2	32.4	1	0	68.5	150	4.6732	6.24803
1336	2	32.4	1	0	73.9	163	3.57536	5.3765
1337	2	32.4	1	0	71.2	163	1.92459	6.42322
1338	2	32.4	1	0	73.5	165	3.61676	2.9808
1339	2	32.5	1	0	60.3	163	1.54284	4.81227
1340	2	32.5	1	0	54.4	165	2.85599	4.16906
1341	2	32.6	1	0	84.8	170	4.13646	6.20607
1342	2	32.6	1	0	68.5	168	2.46942	4.60038
1343	2	32.6	1	0	96.6	168	0.918428	3.66264
1344	2	32.6	1	1	75.3	165	2.12461	4.7553
1345	2	32.6	1	0	128.8	175	4.09491	7.27007
1346	2	32.7	1	0	86.6	175	1.65875	0.327246
1347	2	32.7	1	0	70.3	160	2.97032	5.65977
1348	2	32.7	1	0	104.3	157	4.23956	5.50681
1349	2	32.7	1	0	79.8	163	2.36551	4.18589
1350	2	32.7	1	0	86.6	163	7.06973	9.67422
1351	2	32.8	1	0	55.3	160	2.52389	6.28235
1352	2	32.8	1	0	64.9	165	2.46469	3.94749
1353	2	32.8	1	0	61.2	170	4.55304	4.36896
1354	2	32.8	1	0	86.6	168	0.4064	0.850302
1355	2	32.8	1	0	69.9	165	0.690277	1.7168
1356	2	32.8	1	0	63	160	4.07549	3.7849
1357	2	32.8	1	0	55.8	170	0.319553	2.94351
1358	2	32.9	1	1	80.7	160	1.35764	3.82492
1359	2	32.9	1	0	55.8	165	0.573559	1.93924
1360	2	32.9	1	0	60.3	170	3.84459	5.19217
1361	2	32.9	2	0	90.7	160	1.01225	0.0024982
1362	2	33	1	0	70.3	170	0.227218	3.02377
1363	2	33	1	0	59.4	165	5.59772	4.62547
1364	2	33	1	0	63	165	4.57943	7.16655
1365	2	33	1	0	99.3	165	0.943181	2.41171
1366	2	33	1	0	88.9	168	2.2633	3.86321
1367	2	33	1	0	85.3	178	5.06451	4.62309
1368	2	33	1	0	68	168	1.98003	4.42441
1369	2	33.1	1	0	77.6	165	2.57987	3.90715
1370	2	33.1	1	0	68	163	0.39368	2.13174
1371	2	33.1	1	0	99.3	173	3.63984	5.22806
1372	2	33.1	1	0	77.1	175	3.72364	5.25574
1373	2	33.1	1	0	89.4	163	1.04035	5.06967
1374	2	33.1	1	0	58.1	163	1.67956	3.54353
1375	2	33.2	1	0	79.8	173	3.44066	6.70189
1376	2	33.2	1	0	66.2	173	7.38631	9.18728
1377	2	33.2	1	0	60.3	157	3.5204	7.57606
1378	2	33.3	1	0	53.1	155	1.56906	5.65531
1379	2	33.3	1	0	67.1	173	4.05387	2.01428
1380	2	33.3	1	0	80.3	168	4.69915	4.0477
1381	2	33.3	1	0	85.7	168	3.99107	3.31225
1382	2	33.3	1	0	56.2	163	1.26476	1.32148
1383	2	33.4	1	0	61.7	173	1.80311	2.51081
1384	2	33.5	1	0	64.4	165	2.15722	4.08041
1385	2	33.5	1	0	76.7	170	0.599021	0.571321
1386	2	33.6	1	0	62.6	170	2.08681	4.38122
1387	2	33.6	1	0	61.2	155	3.67026	5.7499
1388	2	33.7	1	0	119.7	160	4.87299	5.42421
1389	2	33.8	1	0	69.4	168	0.971054	4.1903
1390	2	33.8	1	0	63	163	1.45514	5.39334
1391	2	33.8	1	0	65.8	157	3.86554	3.80825
1392	2	33.8	1	0	99.8	160	1.16023	4.29664
1393	2	33.8	1	0	70.3	168	0.977181	4.17963
1394	2	33.9	1	0	57.2	163	2.00818	8.29351
1395	2	34	1	0	51.3	178	0.890741	4.29912
1396	2	34	1	0	81.2	168	2.85725	5.36567
1397	2	34	1	0	57.6	165	1.1611	3.57899
1398	2	34	1	0	86.2	170	5.87466	4.04907
1399	2	34	1	0	83	165	2.44194	4.28731
1400	2	34	1	0	114.3	168	1.21722	3.53557
1401	2	34.1	1	0	83.9	165	7.73334	4.8919
1402	2	34.1	1	0	129.3	178	1.75328	2.5158
1403	2	34.1	1	0	102.1	163	1.06016	5.71254
1404	2	34.1	1	0	86.2	170	6.10632	7.94104
1405	2	34.1	1	0	73	160	3.89823	5.1575
1406	2	34.1	1	0	75.7	168	3.29759	4.75355
1407	2	34.1	1	0	65.8	160	2.10306	5.68689
1408	2	34.2	1	0	59	163	4.3195	5.71372
1409	2	34.2	1	0	64.4	168	0.686017	2.57081
1410	2	34.2	1	0	74.4	165	2.81122	4.15228
1411	2	34.3	1	0	85.3	173	0.233039	3.0656
1412	2	34.3	1	0	91.2	157	1.34878	2.36939
1413	2	34.4	1	0	73.9	157	3.34673	4.89251
1414	2	34.4	1	0	148.8	168	0.745919	0.577324
1415	2	34.4	1	0	73.9	165	2.54225	3.59965
1416	2	34.4	1	0	62.6	155	2.82456	5.17126
1417	2	34.4	1	0	67.1	170	3.17418	3.80333
1418	2	34.5	1	0	81.6	165	0.205779	4.48047
1419	2	34.5	1	0	64.9	155	3.08089	4.64553
1420	2	34.5	1	0	73	170	0.0861853	4.15891
1421	2	34.5	1	0	64	163	0.893425	4.20012
1422	2	34.5	1	0	70.8	173	1.78289	6.62583
1423	2	34.5	1	0	85.7	160	5.06019	5.84503
1424	2	34.6	1	0	51.3	152	4.00568	2.49979
1425	2	34.6	1	0	67.6	155	0.105872	3.27706
1426	2	34.7	1	0	82.6	163	6.66053	1.87918
1427	2	34.7	1	0	83.5	168	8.79833	2.74975
1428	2	34.8	1	0	69.9	173	4.07875	5.98896
1429	2	34.9	1	0	73.5	165	1.92386	3.29584
1430	2	34.9	1	0	88.9	168	2.85825	7.68913
1431	2	35	1	0	68	165	4.33084	6.38604
1432	2	35	1	0	118.4	-9999	2.55528	5.62547
1433	2	35.1	1	0	64.9	165	2.88205	4.22837
1434	2	35.1	1	0	54.4	157	0.932131	3.98378
1435	2	35.1	2	0	64.9	157	4.07219	0.780725
1436	2	35.2	1	0	68.9	165	1.58534	4.18601
1437	2	35.3	1	0	106.6	168	0.889766	3.03972
1438	2	35.3	1	0	68.9	160	2.74886	2.44089
1439	2	35.3	1	0	78.5	168	6.02299	8.92412
1440	2	35.3	1	0	93.4	175	1.46257	1.6931
1441	2	35.3	1	0	83.5	178	0.48816	1.28209
1442	2	35.4	1	0	59.4	170	1.7994	4.07472
1443	2	35.4	1	0	103.4	163	2.15956	3.54784
1444	2	35.4	1	0	64.4	165	1.29889	3.97287
1445	2	35.4	1	0	101.2	170	1.82415	2.69753
1446	2	35.4	1	0	67.1	168	1.88618	2.08497
1447	2	35.4	1	0	104.8	178	4.78652	4.06008
1448	2	35.6	1	1	54.9	155	3.84795	4.67355
1449	2	35.6	1	0	78.5	165	0.888612	5.88791
1450	2	35.6	1	0	59.4	163	2.02645	4.6436
1451	2	35.6	1	0	68.5	155	3.53067	2.94414
1452	2	35.6	1	0	75.7	173	3.38071	3.87279
1453	2	35.6	1	0	98.4	170	3.12174	5.16355
1454	2	35.6	1	0	61.2	157	5.0684	5.12936
1455	2	35.7	1	0	82.6	168	0.354313	3.29477
1456	2	35.8	1	1	61.7	170	1.16798	4.92417
1457	2	35.8	1	0	61.2	160	0.310579	3.64853
1458	2	35.9	1	0	59	160	3.21093	6.22523
1459	2	35.9	1	0	72.1	160	1.55459	5.63404
1460	2	36	1 5	0	60.3	160	3.26482	6.37552
1461	2	36	1	0	77.6	168	1.61859	4.92764
1462	2	36.1	1	0	70.3	163	1.70227	5.20864
1463	2	36.1	1	0	104.8	178	3.66318	3.1233
1464	2	36.2	1	0	62.6	165	2.71996	3.62012
1465	2	36.2	1	0	70.3	173		7.05309
1466	2	36.3	1	0	61.7	157	5.18008	3.93378
1467	2	36.3	1	0	62.1	173	1.46887	0.65347
1468	2	36.4	1	0	80.7	170	3.01481	0.462402
1469	2	36.4	1	0	52.2	160	2.00019	1.97927
1470	2	36.4	1	0	73.5	180	2.64913	5.20609
1471	2	36.4	1	0	84.4	165	2.53739	2.96628
1472	2	36.4	1	0	80.3	163	0.402629	2.71515
1473	2	36.5	1	0	60.3	168		3.14764
1474	2	36.5	1	0	74.8	163	0.459904	3.62633
1475	2	36.5	1	0	113.4	165	7.6445	8.75712
1476	2	36.6	1	0	65.8	160	2.03924	3.8947
1477	2	36.6	1	0	64.4	160	2.33439	4.15385
1478	2	36.6	1	0	110.7	170	0.334599	2.94948
1479	2	36.6	1	0	68	163	1.79936	3.00663
1480	2	36.6	1	0	72.1	160	1.85775	6.25861
1481	2	36.8	1	0	50.8	160	2.64344	3.99774
1482	2	37	1	0	77.1	175	6.24415	6.14493
1483	2	37	1	0	59	157	3.45679	3.46701
1484	2	37.1	1	0	56.7	160	3.63339	5.57319
1485	2	37.2	1	0	67.1	165	0.983367	5.40933
1486	2	37.2	1	0	60.8	165	0.833546	3.22812
1487	2	37.3	1	0	79.4	175	5.02316	6.79826
1488	2	37.6	1	1	59.4	160	1.2535	2.07842
1489	2	37.6	1	0	61.2	152	2.53409	5.18771
1490	2	37.6	1	0	69.4	168	4.4288	5.23549
1491	2	37.6	1	0	78.9	163	1.88276	5.27443
1492	2	37.6	1	0	101.2	168	2.06267	4.71319
1493	2	37.7	1	0	93	165	1.07062	1.36003
1494	2	37.7	1	0	74.4	163	2.74563	4.93169
1495	2	37.8	1	0	98	165	2.37303	0.615016
1496	2	37.9	1	0	82.1	157	0.346135	1.83839
1497	2	37.9	1	0	59	165	1.32651	4.46077
1498	2	37.9	1	0	68	178	5.80589	5.28056
1499	2	38	1	0	68.9	165	2.77415	4.01299
1500	2	38	1	0	104.3	168	1.03177	4.10118
1501	2	38	1	0	98.4	165	2.7657	4.26564
1502	2	38.2	6	1	57.6	150	4.07253	5.61638
1503	2	38.3	1	0	70.8	170	1.11089	2.09024
1504	2	38.3	1	1	73.9	173	1.27251	1.48169
1505	2	38.4	1	0	71.7	-9999	1.33701	5.21411
1506	2	38.4	1	0	101.6	163	0.97052	2.80332
1507	2	38.4	1	0	78.9	165	4.67542	3.37436
1508	2	38.5	1	0	66.2	160	3.36946	3.65914
1509	2	38.5	1	0	83.9	168	0.493836	0.905935
1510	2	38.6	1	0	68	170	0.997214	2.3726
1511	2	38.7	1	0	52.2	155	3.5781	4.21881
1512	2	38.7	1	0	72.1	157	5.10585	6.61547
1513	2	38.8	1	0	65.8	170	4.52176	4.13137
1514	2	39.1	1	0	61.7	165	1.37042	3.84989
1515	2	39.2	1	0	78.9	160	1.49393	2.52815
1516	2	39.3	2	0	56.7	183	5.12604	3.41861
1517	2	39.4	1	0	66.2	165	1.11023	8.37495
1518	2	39.5	1	0	60.8	163	2.72003	4.5815
1519	2	39.7	1	0	77.1	168	7.38048	10.3846
1520	2	39.7	1	0	65.8	160	3.2364	4.33841
1521	2	39.7	1	0	69.9	163	2.0283	4.15087
1522	2	40	1	0	72.6	165	1.34475	2.06918
1523	2	40.2	2	0	83.9	160	0.580134	2.80642
1524	2	40.3	1	0	106.6	173	0.927996	5.1063
1525	2	41.1	1	0	67.6	165	1.73088	1.70028
1526	2	41.1	1	0	73.5	165	4.70545	4.79154
1527	2	41.2	1	0	84.4	163	0.442248	4.91324
1528	2	41.3	1	0	92.5	165	3.45379	3.82333
1529	2	41.5	1	0	98.4	175	1.05593	6.33142
1530	2	41.5	1	0	66.2	163	0.896592	2.0448
1531	2	41.7	1	0	106.6	152	2.07204	3.02351
1532	2	41.9	1	0	80.7	163	3.08157	6.15299
1533	2	42.3	1	0	59.9	157	1.1613	3.03955
1534	2	42.4	1	0	85.3	165	0.772785	2.77669
1535	2	42.6	1	1	86.6	170	2.15208	2.19496
1536	2	43.1	1	0	74.4	163	3.51678	1.1515
1537	2	43.2	1	0	68.5	157	3.45262	3.76735
1538	2	43.2	1	0	84.8	163	0.388437	1.66452
1539	2	43.3	1	0	56.7	-9999	7.16169	2.19426
1540	2	43.4	1	0	68.9	155	2.90207	5.89718
1541	2	44.4	1	0	65.8	160	6.3714	7.64362
1542	2	45.2	1	0	73.5	165	0.0515499	3.53206
1543	1	18.2	1	0	65.8	175	4.26001	5.57444
1544	1	18.3	1	0	88.5	183	3.41212	4.47321
1545	2	18.4	1	1	61.2	155	6.02621	5.26312
1546	1	18.5	1	0	72.6	185	0.200205	4.21863
1547	2	18.5	1	0	75.3	160	3.39695	3.19305
1548	1	18.5	1	0	61.7	178	3.07939	4.71069
1549	2	18.7	1	0	52.2	157	0.295664	2.37963
1550	2	18.8	1	0	65.8	178	0.829994	1.96035
1551	2	18.9	1	0	56.7	150	1.8875	0.141732
1552	1	18.9	1	0	57.6	168	4.39878	3.56089
1553	2	19	1	0	64.9	173	5.45092	5.73308
1554	1	19	1	0	74.8	188	4.44179	2.75686
1555	1	19	3	0	59	165	3.48327	5.67918
1556	1	19	1	0	88.5	185	1.89553	3.02999
1557	2	19.1	1	0	61.2	175	2.35309	6.71772
1558	1	19.2	1	1	56.7	163	7.02134	5.94336
1559	2	19.2	1	0	57.6	157	1.6965	4.89923
1560	2	19.3	1	0	58.1	165	5.44431	4.64384
1561	2	19.3	1	0	53.5	165	3.22845	6.43016
1562	1	19.3	1	0	77.1	178	3.11022	5.99323
1563	1	19.3	1	0	61.2	178	3.01801	4.61403
1564	2	19.5	1 3	0	69.9	165		8.94592
1565	2	19.5	1	0	54.4	168	6.63774	7.53305
1566	2	19.5	1	0	61.2	165	2.75142	5.21826
1567	1	19.5	1	0	83.9	170	3.7377	2.7224
1568	2	19.6	1	0	74.8	168	7.31398	8.20441
1569	2	19.7	1	0	72.6	173	3.87126	1.15158
1570	2	19.7	1	0	59.4	168	9.19608	7.63507
1571	1	19.7	1	0	68	173	5.51803	8.89557
1572	1	19.8	3	0	70.3	173	1.04599	3.03596
1573	1	19.9	1	0	72.6	178	3.5032	4.97986
1574	2	19.9	1	0	61.2	165	4.39574	6.01138
1575	1	19.9	3	0	76	180	6.93135	7.64987
1576	1	20	1	0	74.8	180	4.44729	6.68215
1577	2	20	1	0	61.2	175	4.12186	3.62291
1578	2	20	1	0	77.1	168	0.43014	2.58914
1579	1	20	1	0	83.9	183	3.27376	2.98282
1580	1	20	1	0	72.6	173	0.395896	3.43218
1581	1	20	1	0	108.9	193	2.81584	2.11407
1582	1	20.1	1	0	104.3	191	4.43033	6.83058
1583	1	20.1	1	0	70.3	170	1.98491	4.66024
1584	1	20.1	1	0	68	183	3.43914	6.07644
1585	1	20.1	1	0	72.6	178	0.327061	2.61392
1586	1	20.2	1	0	77.1	178	0.672917	0.994845
1587	1	20.2	1	0	93	180	2.02154	1.86527
1588	2	20.3	1	0	59.9	165	5.64712	5.66471
1589	2	20.3	1	0	68	170	4.2559	6.65186
1590	2	20.4	1	1	69.4	168	3.01054	6.90967
1591	2	20.4	3	0	55.8	160	2.16586	3.0547
1592	1	20.4	1	0	79.4	163	3.55708	4.259
1593	1	20.4	1	0	97.5	191	4.9833	4.95683
1594	1	20.4	1	0	86.2	191	4.29719	7.71905
1595	1	20.4	1	0	68	180	2.92498	3.43938
1596	1	20.5	1	0	79.4	178	1.76505	2.31973
1597	1	20.5	1	0	59	168	0.316413	0.352043
1598	2	20.6	3	0	48.5	160	0.851074	0.396168
1599	2	20.6	3	0	56.7	163	0.367702	2.47397
1600	1	20.6	1	0	92.5	188	0.742609	2.90651
1601	2	20.6	3	0	61.2	168	3.35106	4.49837
1602	2	20.6	1	0	56.7	155	3.16495	3.38842
1603	1	20.7	1	0	113.4	198	1.41719	2.30629
1604	2	20.7	1	0	61.2	160	1.79323	5.30202
1605	2	20.8	1	0	52.2	152	6.28417	7.28906
1606	2	20.9	1	0	61.2	170	6.88176	5.82123
1607	2	20.9	1	0	68	163	4.49586	8.23921
1608	2	20.9	1	0	62.1	168	4.90911	4.93309
1609	1	21	1	1	71.7	178	3.44168	5.35685
1610	2	21	1	0	81.6	168	3.48496	3.34893
1611	2	21.1	1	0	55.3	165	2.31371	2.61927
1612	2	21.2	1	0	49.4	157		2.5071
1613	1	21.2	1	0	75.7	178	4.91658	5.86784
1614	2	21.2	1	0	58.5	163	2.87093	4.22084
1615	1	21.3	1	0	79.8	185	4.69339	6.45008
1616	2	21.3	1	0	61.2	170	4.30686	3.23668
1617	2	21.4	1	0	63.5	175	3.3473	4.63137
1618	1	21.4	1	0	84.8	183	1.74924	1.94699
1619	2	21.5	1	0	56.7	170	4.4438	8.30968
1620	2	21.5	1	0	54.4	157	2.67209	2.77569
1621	2	21.5	1	0	59	170	4.88291	6.86403
1622	2	21.5	1	0	57.2	170	1.82469	4.29089
1623	1	21.5	1	0	86.2	185	4.345	6.29063
1624	2	21.5	1	0	62.6	168	3.67091	4.43744
1625	2	21.5	1	0	59	160	3.14241	5.52223
1626	1	21.5	1	0	52.2	170	2.76914	6.82359
1627	2	21.6	1	0	61.2	165	3.60925	7.78322
1628	2	21.6	1	0	59	157	2.78556	3.28564
1629	1	21.6	3	0	71.7	185	0.380322	2.70428
1630	1	21.6	3	0	66.7	165	1.79042	0.738331
1631	2	21.7	1 3	0	45.4	155	2.44172	5.08843
1632	1	21.7	1	0	77.1	178	1.2023	4.13109
1633	1	21.7	1	0	70.3	180	0.283688	2.34876
1634	2	21.8	3	0	53.1	157	0.0415006	1.65152
1635	1	21.8	1	0	62.1	175	2.32932	4.82919
1636	1	21.8	1	0	99.8	183	3.1996	3.82193
1637	2	21.9	1	0	61.2	168	5.52832	7.4374
1638	2	21.9	1	0	63.5	175	1.33997	3.38519
1639	1	21.9	1	0	81.6	178	8.38766	8.03202
1640	2	22	1	0	56.7	165	4.19363	5.68645
1641	2	22	1	0	74.8	165	3.73466	4.34708
1642	2	22	1	0	69.4	170	5.01776	4.76563
1643	2	22.1	1	0	56.7	157	4.5716	2.00095
1644	2	22.1	3	0	54.4	157	2.54748	5.918
1645	1	22.1	3	0	74.8	170	2.72664	4.99611
1646	1	22.2	1	0	81.6	173	1.21898	4.2972
1647	1	22.2	3	0	74.8	180	1.97849	2.59157
1648	2	22.2	1	0	54.4	160	2.92976	5.86166
1649	1	22.2	3	0	63	175	1.30904	0.86223
1650	1	22.2	1	0	90.7	185	0.838209	4.64787
1651	1	22.3	1	0	71.2	173	1.59511	5.5924
1652	1	22.3	3	0	74.8	168	1.12251	1.26023
1653	2	22.4	1	0	61.2	168	7.98706	9.26249
1654	2	22.4	1	0	65.8	168	2.4747	2.5579
1655	2	22.4	1	0	63.5	168	0.534793	1.89736
1656	2	22.4	1	0	59	170	2.06278	3.20481
1657	1	22.4	1	0	72.6	175	0.923998	1.72796
1658	1	22.5	1	0	77.1	193	3.04174	7.78707
1659	2	22.6	1	0	65.8	173	0.877393	5.11335
1660	2	22.6	1	0	90.7	168	4.22945	4.98376
1661	1	22.6	1	0	68	175	0.872043	0.748441
1662	2	22.7	1	0	67.1	165	3.88277	2.79932
1663	1	22.7	1	0	90.7	188	3.82717	3.94523
1664	2	22.8	1	0	55.3	173	5.54666	4.95707
1665	1	22.8	1	0	72.6	175	7.19115	7.22508
1666	1	22.9	3	0	79.4	178	6.96494	11.6487
1667	2	23	1	0	65.8	170	4.71581	5.0729
1668	2	23	1	0	52.2	170	7.61955	4.8683
1669	1	23	3	0	54.9	168	5.19965	3.54431
1670	1	23	1	0	72.6	175	1.13632	2.20523
1671	1	23.1	1	0	86.2	185	4.4949	3.87338
1672	1	23.1	3	0	70.3	168	2.20165	3.63163
1673	1	23.2	1	0	81.6	173	2.16171	3.18626
1674	1	23.2	1	0	74.8	178	1.55116	6.72741
1675	1	23.2	1	0	80.7	183	0.815685	2.48353
1676	2	23.3	1	0	61.2	157	6.05786	4.10677
1677	2	23.4	1	0	59	157	5.77471	5.75551
1678	2	23.4	1	0	63.5	157	5.81522	3.41828
1679	1	23.5	1	0	95.3	183	4.5228	6.12018
1680	1	23.5	3	0	73.5	175	6.49844	6.53239
1681	2	23.6	1	0	68	150	0.375707	3.47486
1682	2	23.7	1	0	-8888	165	1.87391	1.34779
1683	2	23.7	1	0	81.6	168	6.78983	5.99163
1684	1	23.7	3	0	64	178	0.954122	4.82965
1685	1	23.8	1	0	81.6	183	4.84061	5.5237
1686	1	23.9	1	0	86.2	173	0.408191	4.97798
1687	2	23.9	1	0	54.4	160	2.69789	3.82046
1688	2	24	1	0	72.6	170	0.228444	1.74867
1689	2	24.2	1	0	52.2	155	3.53746	5.22972
1690	2	24.2	1	0	70.3	173	0.179112	3.52118
1691	2	24.2	1	0	56.7	160	6.07709	7.27479
1692	1	24.2	1	0	74.8	183	0.902318	3.64365
1693	1	24.2	1	0	70.3	185	4.65582	4.49291
1694	2	24.3	1	0	60.3	160	3.14495	1.51254
1695	1	24.3	3	0	63.5	173	3.60072	3.59526
1696	2	24.3	1	0	77.1	175	1.29558	4.69328
1697	2	24.4	1	0	63.5	168	2.85952	5.14136
1698	2	24.5	1	0	49.9	150	3.52592	1.55781
1699	2	24.5	1	0	61.2	173	5.06575	4.76012
1700	1	24.5	1	0	93.9	183	5.18103	4.62377
1701	2	24.6	1	0	56.7	173	0.809237	1.68099
1702	2	24.7	1	0	63.5	168	5.47434	5.16913
1703	2	24.7	1	0	69.4	168	3.76709	2.91674
1704	2	24.7	1	0	54.4	165	0.00641012	1.33204
1705	2	24.8	1	0	59	165	1.12765	1.01144
1706	2	24.9	1	0	104.3	173	2.58357	6.37818
1707	1	24.9	3	0	69	163	4.25336	2.94777
1708	2	25	1	0	55.3	152	3.11067	7.29829
1709	1	25.1	3	0	83	183	0.91903	2.23995
1710	2	25.2	1	0	68	173	1.47943	3.71032
1711	2	25.3	1	0	86.2	178	3.95224	6.97633
1712	2	25.4	1	0	59.9	163	5.86871	4.1365
1713	1	25.4	-8888	1	77.1	170	1.85851	4.41451
1714	2	25.5	1	0	76.2	173	3.29118	7.15307
1715	2	25.5	1	0	90.7	165	3.98231	3.13107
1716	2	25.6	1	0	45.4	155	2.3465	2.97057
1717	2	25.6	1	0	45.4	155	3.64482	2.57795
1718	2	25.6	1	0	63.5	178	2.14511	6.14702
1719	1	25.6	3	0	98.9	180	1.84471	3.03181
1720	1	25.8	1	0	108.9	180	0.94847	2.04341
1721	1	25.8	3	0	75.3	180	3.50668	6.3695
1722	1	25.9	1	0	79.4	178		5.39627
1723	1	25.9	3	0	61.2	170	1.45944	0.510698
1724	2	26.1	1	0	43.1	150	3.1144	6.51639
1725	2	26.2	1	0	59	163	2.79359	7.07353
1726	1	26.6	1 3	0	113.4	173	4.11101	3.31082
1727	2	26.8	1	0	70.8	170	3.16445	4.98452
1728	2	26.8	1	0	63.5	170	4.59326	7.62987
1729	1	26.9	1	0	78	183	4.53864	5.6942
1730	1	27.1	1	0	95.3	175	4.96519	5.56844
1731	2	27.1	1	0	81.6	165	4.26121	5.01692
1732	2	27.1	1	0	67.1	173	1.89566	3.71091
1733	1	27.1	1	0	70.3	178	0.631628	3.70792
1734	2	27.2	1	0	67.6	168	3.70908	3.74251
1735	2	27.3	1	0	61.2	157	3.78611	2.71554
1736	1	27.3	3	0	70	180	1.61489	3.12772
1737	2	27.4	1	0	76.2	170	3.02291	4.55035
1738	1	27.5	1	0	68	175	4.69544	4.71298
1739	2	27.6	1	0	75.7	165	4.21675	4.57392
1740	1	27.6	3	0	65.8	173	5.92005	7.73849
1741	1	27.7	1	0	83.9	185	1.60737	4.44975
1742	1	27.8	1	0	106.6	178	5.12601	4.21485
1743	1	27.8	1	1	120.2	188	1.16085	2.54257
1744	2	28	1	0	83.9	178	1.46402	4.57049
1745	2	28.3	1	0	63.5	160	2.86766	4.64325
1746	2	28.5	1	1	83	170	2.65616	0.984838
1747	2	28.5	1	0	53.5	155	0.66043	0.451419
1748	2	28.5	1	0	77.1	173	2.37074	3.69218
1749	2	28.8	1	0	61.2	175	3.3028	5.71236
1750	2	28.8	1	0	61.2	160	3.30561	5.09147
1751	1	28.8	3	0	78	175	0.460594	3.62076
1752	1	28.8	1	0	70.3	188	1.8853	3.53707
1753	1	28.8	1	0	114.3	191	3.01892	0.494422
1754	2	28.9	1	0	71.7	178	6.95527	6.10061
1755	2	29	1	0	68.9	165	2.81814	4.81042
1756	2	29.2	1	0	113.4	170	0.0787945	2.70176
1757	2	29.2	1	0	146.5	163	0.660967	2.38084
1758	1	29.4	1	0	62.6	180	3.66388	2.27565
1759	1	29.4	1	0	65.8	185	4.37908	5.27095
1760	2	29.5	1	0	59	170	3.38454	5.16799
1761	1	29.6	1	0	67.6	175	3.53544	4.41779
1762	1	29.7	1	0	96.2	185	3.33208	4.43997
1763	1	29.7	1	0	74.8	180	5.45866	4.05336
1764	1	29.7	1	0	82.6	180	0.902082	3.25442
1765	2	29.9	1	0	83.9	160	6.76016	7.15211
1766	2	29.9	1	0	68	168	3.35978	4.00821
1767	1	30	3	0	68	170	2.97194	4.27186
1768	1	30	1	0	108.9	188	2.73065	5.28161
1769	2	30	1	0	102.1	155	3.41263	3.17608
1770	2	30.1	3	0	66	160	3.13764	5.34574
1771	2	30.1	1	0	78	178	3.12253	3.42699
1772	2	30.1	1	1	62.6	168	2.0978	6.20709
1773	2	30.1	3	0	68	163	3.73779	3.79831
1774	1	30.1	1	0	72.6	183	1.14287	1.04479
1775	2	30.1	3	0	63.5	163	2.41493	3.04759
1776	2	30.1	1	0	50.3	160	2.32937	6.58674
1777	2	30.2	1	0	57.6	160	6.50767	7.25023
1778	2	30.2	1	0	54.4	155	2.77767	3.42823
1779	2	30.2	1	0	65.8	170	2.14264	3.39067
1780	2	30.2	1	0	158.8	175	1.13881	1.28449
1781	1	30.3	1	0	86.2	188	4.04607	5.27408
1782	2	30.3	1	0	49	163	0.45383	2.67481
1783	2	30.3	1	0	56.7	168	1.94213	2.12835
1784	2	30.3	1	0	79.8	173	4.34609	6.6014
1785	2	30.4	1	0	63.5	157	3.4391	3.51253
1786	2	30.4	1	0	81.6	173	1.83359	7.61257
1787	1	30.4	1	0	101.6	188	1.56354	4.3621
1788	2	30.4	1	0	68	163	5.98789	4.72829
1789	2	30.5	1	0	67.1	165	3.26392	5.40489
1790	2	30.5	1	0	79.4	168	3.72943	3.20288
1791	1	30.5	1	0	77.1	183	6.23042	7.87337
1792	2	30.6	3	0	60.3	152	2.67354	0.585155
1793	2	30.6	1	1	63.5	155	3.19835	3.85222
1794	2	30.6	1	0	54.4	157	1.57166	2.83418
1795	2	30.6	1	0	74.8	165	2.76841	2.76344
1796	2	30.7	1	0	102.1	170	2.4195	3.67679
1797	2	30.7	1	0	77.1	173	5.18565	5.05584
1798	1	30.7	1	0	90.7	175	2.82851	3.5135
1799	2	30.8	1	0	88.5	157	2.72809	7.30636
1800	2	30.8	1	0	66.7	165	1.63583	3.46406
1801	2	30.8	1	0	54.4	165	4.08518	5.08206
1802	2	30.9	1	0	59	170	3.11067	7.98572
1803	2	31	1	0	49	152	1.30939	2.73786
1804	2	31	1	0	99.8	160	3.97878	3.10585
1805	2	31	1	0	64.9	163	6.25994	6.65488
1806	2	31	1	0	58.1	168	2.05348	3.69029
1807	1	31.1	1	0	124.7	183	2.41889	2.8056
1808	1	31.2	1	0	72.6	183	0.614826	3.06233
1809	2	31.2	1	0	73.9	178	6.23541	6.60727
1810	2	31.2	1	0	61.2	173	3.63203	4.34685
1811	1	31.2	3	0	68	163	3.73159	4.60681
1812	1	31.2	1	0	74.8	168	3.36797	3.0495
1813	2	31.3	1	0	79.4	173	2.71176	3.1504
1814	2	31.3	1	0	70.3	168	2.21565	3.21254
1815	2	31.3	1	0	72.6	165	5.47884	4.07473
1816	2	31.4	1	0	86.2	173	2.69324	4.34556
1817	2	31.4	1	0	77.1	160	6.90906	2.47868
1818	2	31.4	1	0	124.7	163	2.88783	6.50143
1819	2	31.5	1	0	83.9	157	0.514302	5.1172
1820	2	31.5	3	0	68	157	3.31298	4.84556
1821	1	31.5	1	0	108.9	180	2.25896	1.76143
1822	2	31.5	1	0	81.6	160	1.7974	6.03804
1823	2	31.5	1	0	82.1	168	6.18341	3.76205
1824	2	31.6	1	0	52.2	157	1.52257	3.7898
1825	1	31.6	1	0	61.2	178	4.23675	3.89927
1826	1	31.6	1	0	96.2	175	2.95582	2.74027
1827	2	31.6	3	0	55.3	150	2.56439	2.63314
1828	2	31.6	1	0	117.9	180	3.95224	5.56508
1829	1	31.6	1	0	70.3	178	2.73945	2.65994
1830	2	31.8	1	0	75.2	165	2.76834	6.77989
1831	2	31.8	1	0	68.9	160	4.335	6.68811
1832	1	31.8	1	0	82.6	175	2.19175	4.10502
1833	2	31.9	1	0	66.7	173	3.21995	4.61804
1834	2	31.9	1	0	61.2	157	4.31283	2.57937
1835	1	31.9	1	0	72	188	8.00446	9.3732
1836	1	31.9	3	0	69.4	163	0.372856	5.4758
1837	2	31.9	3	0	46.3	157	2.41426	1.64001
1838	2	31.9	1	0	90.7	180	3.7145	7.85662
1839	2	32	1	0	117.9	175	3.68709	5.4411
1840	2	32	1	0	77.1	168	6.11027	5.69067
1841	2	32	1	0	78.5	178	4.37139	4.07052
1842	1	32.1	1	0	75.3	175	2.27823	7.20875
1843	1	32.1	1	0	77.1	188	6.02607	7.40849
1844	2	32.1	1	0	53.5	155	9.07931	7.6897
1845	2	32.2	1	0	80.7	163	0.179337	1.44014
1846	1	32.2	1	0	74.8	180	1.83477	4.0839
1847	2	32.2	1	0	56.7	160	4.78599	4.14697
1848	2	32.3	1	0	79.8	165	3.52706	5.60962
1849	2	32.3	1	0	65.8	160	4.35272	4.86044
1850	2	32.3	1	0	54.4	160	3.49309	4.61282
1851	2	32.4	1	0	54	157	5.60041	6.85678
1852	2	32.5	1	0	93	163		2.0125
1853	1	32.5	3	0	59	168	0.303702	2.93963
1854	1	32.7	1	0	72.6	180	1.76412	6.25824
1855	1	32.7	1	0	65.8	191	4.12214	6.35732
1856	2	32.8	1	0	49.9	163	2.82857	5.44479
1857	2	32.9	1	0	61.2	165	3.45711	2.93183
1858	2	32.9	1	0	56.7	173	4.68144	4.11021
1859	1	33	1	0	83.9	185	2.69975	2.62985
1860	2	33	1	0	163.3	173	1.55491	6.58622
1861	2	33.1	1	1	73	160	3.42359	4.95857
1862	2	33.1	1	0	86.2	178	2.71738	5.34419
1863	2	33.5	1	0	82.6	163	1.14409	5.31467
1864	2	33.5	1	0	95.7	163	1.79365	3.19619
1865	2	33.5	1	0	64.9	157	4.59417	3.7466
1866	2	33.5	1	0	80.7	163	3.7612	2.45133
1867	2	33.6	1	0	63.5	175	7.16507	7.59083
1868	2	33.7	1	0	86.2	168	6.74153	5.66206
1869	1	33.8	1	0	90.7	168	2.4782	2.60667
1870	1	33.8	1	0	68	175	2.44207	6.25647
1871	1	33.8	1	0	159.7	191	1.08928	3.20242
1872	2	33.8	1	1	72.6	170	1.6059	0.299163
1873	2	33.8	1	0	90.7	165	3.12255	4.0412
1874	1	34	2	0	77.1	185	2.03036	3.53255
1875	2	34	2	0	88.5	170	4.92731	3.19738
1876	2	34	1	0	131.5	173	1.10027	2.39216
1877	2	34	1	0	102.1	175	4.20295	4.11702
1878	2	34.1	1	0	70.8	168	0.397973	4.66183
1879	1	34.2	1	0	92.1	175	2.21413	1.79401
1880	2	34.2	1	0	56.2	163	1.80482	2.42123
1881	2	34.2	1	0	58.5	165	3.00611	5.51087
1882	2	34.3	1	0	67.1	152	4.50973	3.89775
1883	2	34.3	1	0	68.9	163	4.59119	8.32427
1884	2	34.5	1	0	90.7	155	3.86726	4.73277
1885	2	34.5	3	0	47.6	152	4.29386	2.59574
1886	2	34.6	1	0	147.4	165	3.16997	4.09503
1887	2	34.7	1	0	68	173	0.0354341	1.45683
1888	2	34.7	1	0	96.2	163	1.00779	3.38929
1889	2	34.7	1	0	57.6	160	3.62846	5.58454
1890	2	34.7	1	0	97.1	165	0.42604	1.83715
1891	2	34.8	1	0	50.8	168	1.63889	1.54935
1892	1	34.9	1	0	66.2	173	3.93548	2.73668
1893	2	34.9	1	0	62.6	168	3.24158	5.67165
1894	1	34.9	1	0	107	183	3.51546	5.93505
1895	2	34.9	1	0	108.9	155	8.43224	9.85393
1896	1	34.9	1	0	95.3	188	3.5138	2.87253
1897	2	34.9	1	0	82.6	157	0.891247	4.38932
1898	2	35.1	1	0	136.1	163	0.271139	4.00248
1899	2	35.1	1	0	95.3	178	5.17683	4.19411
1900	2	35.2	1	0	74.8	173	4.12947	6.66718
1901	2	35.3	1	0	61.2	170	2.10236	2.47153
1902	2	35.4	1	0	69.4	183	1.49429	5.17561
1903	2	35.4	1	0	54.4	163	2.51505	1.54655
1904	2	35.6	1	0	51.7	163	3.15816	4.8028
1905	2	35.8	1	0	108.9	178	2.70602	1.76066
1906	2	35.8	1	0	74.8	175	3.60918	3.26201
1907	2	35.9	1	0	70.3	165	1.53051	4.7937
1908	2	35.9	1	0	63.5	168	7.29878	6.68155
1909	2	35.9	1	0	63.5	178	1.91399	3.53165
1910	1	36	1	0	140.6	180	1.09446	4.9693
1911	1	36	1	0	81.6	173	4.24165	6.7877
1912	2	36	1	0	74.8	175	0.83239	5.09135
1913	2	36.1	1	0	56.7	163	1.71445	6.51749
1914	1	36.1	1	0	74.8	175	2.48017	1.98142
1915	2	36.2	1	0	52.6	152	0.931795	1.07622
1916	1	36.2	1	0	63.5	157	5.69575	4.38772
1917	2	36.4	1	0	99.8	165	1.92969	2.20977
1918	2	36.4	1	0	88	165		1.57491
1919	2	36.6	1	0	62.1	168	3.88108	4.63402
1920	1	36.6	1	0	65.8	185	1.68894	2.79363
1921	1	36.6	1	0	86.2	178	4.50507	2.84494
1922	2	36.8	1 3	0	52.2	163	1.79766	2.95564
1923	2	36.8	1	0	113.4	173	0.379081	2.10151
1924	2	36.8	1	0	79.4	163	3.33407	5.63899
1925	1	36.9	1	0	74.8	175	0.493808	3.43679
1926	1	36.9	1	0	89.8	178	1.8567	2.84704
1927	2	37.1	1	0	77.1	173	1.99289	0.860735
1928	2	37.1	1	0	72.6	168	2.14873	4.41608
1929	2	37.2	1	0	51.3	168	4.96913	4.63939
1930	2	37.3	1	0	51.7	157	4.59656	4.39976
1931	2	37.3	1	1	86.2	163	7.20868	2.34067
1932	2	37.4	1	0	73.5	152	1.95029	6.65201
1933	1	37.4	1	0	99.8	173	2.88112	5.24777
1934	2	37.5	1	0	63.5	163	2.96839	5.10524
1935	2	37.5	1	0	88.5	163	4.20944	5.78807
1936	1	37.6	1	0	99.8	180	1.01734	7.07455
1937	2	37.6	1	0	72.6	165	2.31586	2.2749
1938	1	37.6	1	0	77.1	170	5.12333	6.98781
1939	1	37.9	1	0	82.1	178	0.91759	4.47016
1940	2	38	1	0	65.8	165	3.85256	4.37472
1941	1	38	1	0	83.9	185	0.124874	1.52731
1942	2	38.1	1	0	63.5	157	3.80637	6.54305
1943	2	38.2	1	0	77.1	165	1.34354	2.02209
1944	2	38.4	1	0	86.2	163	4.73424	6.69449
1945	2	38.4	1	0	131.5	170	2.82854	3.75693
1946	2	38.4	1	0	56.7	157	5.74712	3.41393
1947	2	38.5	1	0	70.3	173	0.609414	1.32459
1948	1	38.5	1	0	105.2	178	0.495422	4.7867
1949	2	38.6	1	0	62.6	160	2.53839	4.26769
1950	2	38.6	1	0	68	168	4.18992	2.70887
1951	1	38.6	3	0	78	173	2.61324	5.46159
1952	2	38.7	1	0	89.8	160	5.98479	5.28902
1953	2	38.9	1	0	83	168	5.41103	8.3881
1954	2	39.1	1	0	76.7	173	0.287526	0.643792
1955	1	39.1	1	0	95.3	183	1.4915	1.04421
1956	2	39.1	1	0	86.2	170	1.5305	3.67737
1957	2	39.1	1	0	68	178	2.40548	4.59995
1958	1	39.4	1	0	104.3	180	2.29412	1.62499
1959	2	39.4	1	0	74.8	180	6.24038	8.08878
1960	2	39.5	1	0	63.5	168	4.19794	7.91907
1961	2	39.5	1	0	60.8	160	4.04089	0.92517
1962	2	39.6	1	0	62.6	165	0.539402	1.82594
1963	1	39.6	1	0	79.4	170	1.60149	4.47888
1964	2	39.6	1	0	67.1	160	4.34373	3.45737
1965	2	40.1	1	0	77.1	157	5.89525	11.3711
1966	2	40.5	1	0	81.6	178	5.41113	5.03737
1967	1	40.6	1	0	62.6	168	4.54925	7.27298
1968	2	40.6	1	0	56.7	163	1.09921	3.36878
1969	2	40.6	1	0	105.7	168	4.06768	0.842635
1970	2	40.7	3	0	49	163	0.163007	5.16831
1971	2	40.7	1	0	78	163	2.2115	3.8663
1972	2	40.8	1	0	75.7	170	0.94107	4.76266
1973	1	40.8	1	0	89.8	188	1.09774	2.20196
1974	1	41	1	0	136.1	188	0.724012	4.12667
1975	2	41	1	0	72.6	168	3.09873	5.69845
1976	2	41.3	1	0	56.2	170	0.754565	4.01735
1977	2	41.4	1	0	70.3	165	6.08066	4.24448
1978	2	41.4	1	0	60.8	173	4.99587	4.487
1979	2	41.4	1	0	74.8	165	1.48883	5.09246
1980	2	41.5	1	0	89.8	160	1.96891	3.43464
1981	1	41.5	1	0	97.5	185	1.90253	5.88204
1982	2	41.5	1	0	113.4	173	0.507935	1.59897
1983	1	41.9	1	0	90.3	185	3.74623	11.0099
1984	2	42.2	1	0	81.6	173	4.03322	5.56865
1985	2	42.4	1	0	81.6	175	4.54371	4.83514
1986	1	42.4	1	0	74.8	165	3.68435	4.92423
1987	2	42.5	1	0	90.7	183	2.60083	2.43635
1988	1	42.6	1	0	90.7	178	0.272889	3.94757
1989	2	42.9	1	0	74.4	163	3.72451	8.0915
1990	1	42.9	1	0	90.7	173		11.9236
1991	2	43	1	0	74.8	157	1.38183	4.56269
1992	1	43	1	0	79.4	183	3.54332	7.67688
1993	2	43.4	1	0	63.5	168	4.95927	5.48328
1994	2	43.4	1	0	59	152	4.33397	4.79606
1995	2	43.6	1	0	80.7	157	1.11949	2.2764
1996	2	43.8	1	0	68	168	0.87127	6.18247
1997	2	43.9	1	0	85.3	165	1.21847	3.02237
1998	2	43.9	1	0	68	163	2.81808	3.77085
1999	2	44.1	3	0	63	163	1.50187	3.88055
2000	2	44.3	1	0	63.5	165	3.21204	4.90805
2001	2	44.4	1	0	63.5	168	4.63659	7.00786
2002	1	44.5	1	0	97.5	183	2.7056	3.88245
2003	2	44.7	1	0	82.6	152	5.0778	14.6089
2004	1	44.7	1	0	68.9	175	2.22838	6.07585
2005	1	45	5	0	93	170	4.90614	5.17972
2006	1	45.3	1	0	62.6	173	0.974907	3.23159
2007	2	45.3	1	0	79.8	165	3.1197	1.23412
2008	1	45.4	1	0	65.8	173	1.22811	2.19726
2009	1	45.5	1	0	106.6	193	3.51837	1.88871
2010	2	45.8	1	0	88.5	163	1.66123	4.99105
2011	1	45.9	1	0	79.4	180	5.26839	5.0496
2012	2	46.1	1	0	66.7	165	2.54775	10.7547
2013	2	46.3	1	1	56.7	157	2.95909	1.43232
2014	1	46.4	1	0	80.3	175	0.100247	2.89978
2015	2	46.5	1	0	53.5	163	4.35594	4.85006
2016	2	46.5	1	1	75.7	173	2.39732	3.11555
2017	2	46.6	1	0	56.2	178	3.05496	4.34969
2018	2	46.6	1	0	61.2	165	13.5566	7.447
2019	1	46.6	1	0	85.3	173	4.18265	7.0898
2020	1	46.7	1	0	72.6	185	2.84202	3.89782
2021	2	46.7	1	0	67.1	165	1.93773	3.64428
2022	1	47	1	0	104.3	183	1.71664	5.99524
2023	2	47	1	0	59	152	8.21057	6.75603
2024	2	47.1	1	0	78.5	165	3.40887	4.81792
2025	2	47.3	1	0	95.7	165	0.132418	3.39034
2026	1	47.3	1	0	125.6	178	2.90289	2.01994
2027	1	47.4	1	0	81.6	180	4.56616	5.1588
2028	2	47.4	1	0	61.7	163	3.92765	5.38825
2029	2	47.5	1	0	48.1	152	4.11974	7.06914
2030	1	47.5	1	0	90.7	175	3.55552	7.07188
2031	2	47.8	1	0	61.2	173	8.71473	7.68379
2032	1	47.8	1	0	88.5	178	4.18474	5.71563
2033	2	48.2	1	0	68	163	0.627348	3.51689
2034	2	48.3	1	0	83.9	173	8.08993
2035	2	48.3	1	0	68	175	4.27143	6.40653
2036	2	48.5	1	0	70.3	163	2.07498	2.42772
2037	1	48.6	1	0	83.9	180	1.94995	7.72589
2038	2	48.6	1	0	59	170	3.99098	4.46116
2039	2	48.7	1	0	63.5	168	4.23606	4.10977
2040	1	48.8	1	0	93.4	185	2.04736	1.34674
2041	2	48.9	1	0	99.8	165	5.36968	6.99094
2042	1	48.9	1	0	95.3	180	1.82299	4.23776
2043	1	48.9	1	0	86.2	188	5.85678	7.02097
2044	2	49	1	0	65.8	175	3.9844	6.63135
2045	2	49.2	1	0	79.4	168	0.0707752	2.46632
2046	2	49.4	1	0	73.5	173	2.69859	5.64351
2047	1	49.6	1	0	107.5	183		1.84848
2048	2	49.8	1	0	85.3	160	5.78114	7.13688
2049	2	49.8	1	0	68	175	3.95625	6.51824
2050	1	50	1	0	96.2	188	1.23526	5.56164
2051	1	50	1	0	75.7	180	4.81568	4.08962
2052	2	50	1	0	60.8	163	4.68161	5.7171
2053	1	50.2	1	0	124.7	188	5.9155	7.02106
2054	2	50.2	1	0	88.5	163	2.77715	6.14884
2055	2	50.3	1	0	83.9	168	1.381	4.94693
2056	1	50.4	1	0	59	163	5.76801	5.56941
2057	2	50.6	1	0	117.5	170	6.16444	2.44756
2058	2	50.6	3	0	63.5	157	4.43691	5.27506
2059	2	50.6	1	0	63.5	155	4.94032	2.8596
2060	2	50.8	1	0	77.1	157	2.7536	5.03432
2061	2	51.1	1	0	81.6	160	5.48083	5.65682
2062	2	51.5	1	0	87.5	168	1.04022	1.42018
2063	2	51.8	1	0	63.5	173	5.15659	5.42871
2064	2	51.8	1	0	108.9	175	2.54195	2.43422
2065	2	51.9	1	0	59	155	2.80871	3.85365
2066	2	52.3	1	0	65.8	170	1.85083	2.98157
2067	1	52.3	1	0	70.3	175	6.30468	5.22526
2068	2	52.4	1	0	45.4	157	6.95997	7.09968
2069	2	52.5	1	0	77.1	175	5.2656	5.79861
2070	2	52.5	1	0	68	155	1.3434	5.98069
2071	2	52.6	1	0	59.9	163	0.772998
2072	2	52.7	1	0	86.2	173	1.48204	6.29501
2073	2	52.9	1	0	85.7	163	2.22313	2.81228
2074	2	53	1	0	96.2	160	4.92984	5.88602
2075	1	53.2	1	0	181.4	191	2.76071	6.34478
2076	1	53.4	1	0	77.1	180	0.682258	4.90424
2077	2	53.6	1	0	69.9	165	4.76619	4.28976
2078	2	53.7	1	0	68.9	170	3.67622	0.8635
2079	1	53.8	1	0	118.8	173	2.0722	2.00002
2080	2	53.9	1	0	99.8	170	2.92408	3.66572
2081	2	53.9	1	0	90.7	180	1.67944	5.85932
2082	1	53.9	1	0	73.9	178	0.14966	0.00435801
2083	2	54	1	0	59.9	163	4.52418	5.84166
2084	1	54.3	1	0	104.3	170	2.56736	3.26843
2085	2	54.4	1	1	59	163	0.866302	3.07174
2086	2	54.5	1	0	87.5	170	6.93666	7.69852
2087	2	54.5	1	0	70.3	155	6.18683	6.63573
2088	2	54.5	1	0	65.8	157	5.44033	5.97316
2089	2	54.5	1	0	78	165	3.01288	4.1149
2090	2	54.5	1	0	103.4	165	4.15763	2.68833
2091	2	54.6	1	0	86.2	157	5.22381	4.10546
2092	2	54.7	1	0	53.5	155	4.34721	7.87305
2093	2	54.8	1	0	74.8	168	0.739151	0.879473
2094	2	54.8	1	0	57.2	157	3.33648	3.89267
2095	2	54.9	1	0	93	173	3.30395	8.02615
2096	2	55.1	1	0	59	163	3.83103	1.15629
2097	2	55.2	1	0	93	178	6.26658	7.29653
2098	1	55.2	1	0	104.3	180	4.71761	4.58456
2099	1	55.3	1	0	95.3	188	1.48213	3.81647
2100	2	55.3	1	0	88.5	168	2.92055	2.72909
2101	2	55.5	1	0	73.5	168	0.621569	3.53861
2102	2	55.7	1	0	81.2	173	2.37855	4.35598
2103	2	55.9	1	0	73	173	6.38584	7.99813
2104	2	55.9	1	0	135.2	170	5.0327	6.6396
2105	2	56.1	1	0	117.9	160	4.05472	3.30357
2106	2	56.2	1	0	68	173	4.88006	7.60644
2107	1	56.2	1	0	93	178	3.56946	4.92342
2108	2	56.3	1	0	60.8	168	5.80472	6.36122
2109	2	56.3	1	0	67.1	173	6.66933	5.62049
2110	2	56.3	1	0	71.2	168	5.92182	4.67987
2111	1	56.5	1	0	88.9	175	5.83421	5.27086
2112	2	56.5	1	0	49.9	155	4.79898	5.82944
2113	2	56.6	1	0	60.3	150	6.46379	7.8279
2114	1	56.7	1	0	80.3	183	2.98858	3.78522
2115	1	56.7	1	0	77.1	185	0.332292	3.44191
2116	2	56.8	1 5	0	55.8	163	4.71128	2.20377
2117	2	56.8	1	0	72.6	168	3.72954	3.81205
2118	2	56.9	1	0	65.8	157	0.340781	2.55307
2119	2	57	1	0	73.9	163	4.26507	9.44787
2120	2	57	1	0	90.7	168	5.03059	5.48448
2121	2	57.1	1	0	81.6	173	3.01909	2.51122
2122	2	57.1	1	0	83.5	163	2.62448	6.57376
2123	2	57.2	1	0	72.6	165	0.232332	4.78264
2124	2	57.2	1	0	75.3	173	0.380052	2.88054
2125	1	57.2	1	0	97.5	185	2.40332	3.9094
2126	2	57.3	1	0	62.6	160	3.81099	7.93023
2127	2	57.3	1	0	76.2	163	1.85609	5.16551
2128	2	57.3	1	0	45.4	150	4.96399	6.53344
2129	1	57.3	1	0	133.8	185		2.34319
2130	2	57.4	1	0	81.6	163	5.8347	4.55625
2131	1	57.4	1	0	60.8	188	0.962835	0.67296
2132	1	57.5	1	0	97.1	173	2.05421	7.11241
2133	1	57.6	1	0	83.9	185	2.54632	4.40235
2134	2	57.6	1	0	83.9	180	4.53319	8.48189
2135	1	57.6	1	0	83.9	170	1.9967	7.49052
2136	1	57.6	1	0	81.6	173	1.47042	4.77012
2137	1	58	1	0	81.6	185	2.25014	4.54597
2138	2	58.1	1	0	84.8	155	3.36276	4.54168
2139	2	58.2	1	0	66.7	160	3.31548	6.69214
2140	2	58.2	1 5	0	90.3	150	7.24417	6.65529
2141	2	58.2	1	0	74.8	163	3.16289	3.40112
2142	2	58.3	1	0	79.4	165	2.55248	4.47006
2143	1	58.3	1	0	70.3	183	1.23412	1.75096
2144	2	58.3	1	0	52.2	165	4.3198	4.86591
2145	2	58.6	1	0	68	157	1.28972	6.24887
2146	2	58.6	1	0	70.8	155	3.63953	8.77438
2147	2	58.6	1	0	68	165	2.63262	4.45763
2148	2	58.7	1	0	77.1	168	3.35297	5.93645
2149	1	58.7	1 3	0	115.7	178	2.13986	1.21409
2150	2	58.8	1	0	76.2	163	2.55353	3.94134
2151	2	58.8	1	0	95.3	165	1.23656	1.33963
2152	2	59.1	1	0	65.3	160	7.06306	7.36225
2153	2	59.1	1	0	108.9	157	1.7282	2.6028
2154	1	59.1	1	0	98.9	180	4.28359	3.93488
2155	2	59.2	1	0	77.1	157	2.5866	5.12233
2156	2	59.5	1	0	77.1	168	3.01914	5.8779
2157	2	59.5	1	0	49.9	157	3.227	4.86151
2158	2	59.7	1	0	63.5	170	2.79544	4.21577
2159	2	59.8	1 5	0	78.9	155	1.35281	3.56982
2160	1	59.9	1	0	106.6	168	2.73017	4.86551
2161	2	59.9	1	0	83.9	163	5.23104	4.74767
2162	2	60	1	0	64.4	168	6.59474	3.70265
2163	1	60	1	0	77.1	175	2.11271	2.6697
2164	1	60.2	1	0	61.7	165	4.53297	6.69757
2165	2	60.2	1	0	56.2	160	2.02133	3.40651
2166	2	60.3	1	0	63.5	163	3.59718	5.01336
2167	1	60.5	1	0	87.1	168	3.46229	12.0854
2168	2	60.5	1	0	77.1	157	3.20361	3.47731
2169	2	60.8	1	0	65.8	155	5.90011	8.49639
2170	2	61	1	0	63.5	157	4.17737	6.21292
2171	2	61.1	1	0	83.9	160	3.4961	1.76783
2172	1	61.1	1	0	66.7	168	3.79795	3.90375
2173	2	61.2	1	0	56.7	173	6.02125	8.80823
2174	1	61.2	1	1	100.7	173	2.61341	1.89671
2175	1	61.6	1	0	96.6	188	2.92506	1.05132
2176	1	61.7	1	0	77.1	180	4.77292	4.85785
2177	1	61.9	1	0	138.3	173	1.67383	5.2104
2178	2	62	1	0	63.5	165	0.98224	5.57048
2179	2	62	1	0	93.4	160	4.54504	3.76551
2180	1	62.4	1	0	76.2	175	6.75024	4.18534
2181	2	62.4	1	0	71.7	157	3.36829	0.203791
2182	1	62.9	1	0	73.9	163	2.80551	5.7474
2183	2	62.9	1	0	84.8	157	3.3751	5.35608
2184	2	63.2	1	1	61.2	150	4.53363	2.39801
2185	2	63.2	1	0	97.5	183	1.8394	3.53586
2186	2	63.3	1	0	86.2	165	3.42349	4.59859
2187	2	63.6	1	0	65.8	173	2.8631
2188	2	63.6	1	0	49.9	157	4.76843	6.29399
2189	2	63.6	1	0	56.7	157	0.877762	4.2078
2190	1	63.8	1	0	90.7	173	1.26355	5.4917
2191	1	63.8	1	0	131.5	180	3.20828	4.72974
2192	1	63.8	1	0	74.8	178	3.97675	7.50742
2193	2	63.9	1	0	89.4	168	1.59124	1.54824
2194	2	64	1	0	56.2	168	7.99741	7.03147
2195	2	64.1	1	0	81.6	170	1.9984	2.14478
2196	2	64.2	1	0	93.9	170	0.584739	3.29115
2197	2	64.4	1	0	65.8	168	4.32547	5.44213
2198	2	64.4	1	0	75.3	163	6.20659	3.41838
2199	1	64.5	1	0	73.9	180	8.0156	1.01987
2200	2	64.6	1	0	88	152	2.49638	2.16741
2201	2	64.6	1	0	58.1	160	3.28772	6.19299
2202	1	64.7	1	0	124.7	178	4.61679	3.68142
2203	2	64.8	1	0	61.2	165	3.21983	5.40102
2204	2	65	1	0	88.5	175	4.70776	4.15246
2205	2	65	1	0	81.6	165	3.80215	4.54462
2206	2	65.3	1	0	76.7	163	4.69003	4.18329
2207	1	65.4	1	0	75.3	180	8.16418	4.29699
2208	1	65.5	1	0	99.3	180	3.62906	2.06844
2209	1	65.5	1	0	81.6	180	0.859097	4.76263
2210	2	65.7	1	0	70.3	178	2.39172	3.95242
2211	1	66.1	1	1	106.6	173	3.07699	4.93895
2212	2	66.2	1	0	70.3	175	4.71716	8.04041
2213	2	66.2	1	0	72.6	163	3.87278	5.75684
2214	2	66.2	1	0	61.7	163	5.57414	6.97498
2215	2	66.2	1	0	56.7	163	0.64015	0.473336
2216	2	66.3	1	0	61.2	160	2.90813	3.07968
2217	2	66.3	1	0	72.1	157	3.32543	7.08138
2218	1	66.4	1	1	82.1	175	2.07847	1.57448
2219	1	66.4	1	1	76.2	170	3.72613	6.58514
2220	2	66.5	1	0	53.5	147	5.9891	7.18794
2221	2	66.5	1	0	74.4	168	1.83277	5.54784
2222	2	66.5	1	0	75.7	155	1.88602	2.78534
2223	2	66.8	1	0	60.8	168	3.79636	3.80377
2224	1	66.8	1	0	122	188	2.53642	6.11473
2225	2	66.9	1	0	61.2	163	2.67742	2.92822
2226	2	67	1	0	56.7	168	3.15523	5.39902
2227	1	67	1	0	122.5	178	1.81059	2.53074
2228	2	67.2	1	0	56.2	163	2.27493	5.34404
2229	2	67.4	1	0	54.4	157	4.63372	6.52408
2230	1	67.7	1	0	95.7	185	3.7761	8.09921
2231	2	67.9	1	0	88.5	163	5.46687	7.54527
2232	1	68.7	1	0	111.1	173	0.752066	0.864906
2233	1	68.9	1	0	67.6	163	2.21574	4.59986
2234	2	69	1	0	108.9	163	2.42817	0.550439
2235	2	69.2	1	0	65.8	163	3.93759	2.89661
2236	1	69.3	1	0	77.1	180	1.71236	5.75946
2237	1	69.3	1	0	85.3	175	0.970828	2.05672
2238	1	69.4	1	0	85.7	180	2.73417	4.77612
2239	2	69.4	1	0	78.5	152	2.28201	3.03601
2240	1	69.4	1	0	117.9	165	2.05497	4.35421
2241	2	69.6	1	0	61.2	168	3.82289	7.19536
2242	1	69.8	1	0	81.6	175	2.22686	3.34772
2243	2	70.2	3	0	53.1	155	0.193511	2.63583
2244	2	70.5	1	0	90.7	160	3.08109	4.22278
2245	2	70.9	1	0	53.1	157	0.388584	3.43853
2246	2	70.9	1	0	72.6	165	7.41443	7.29193
2247	1	71	1	0	79.4	175	2.82357	4.96367
2248	2	71	1	0	64.4	157	1.01598	5.24965
2249	2	71	1	0	60.8	157	1.64164	3.22301
2250	1	71.1	1	0	86.2	183	2.83811	4.64387
2251	2	71.3	1	0	67.1	173	5.34673	6.26785
2252	1	71.4	1	0	93	175		2.54709
2253	1	71.5	1	0	99.8	175	1.69875	4.27602
2254	1	71.5	1	0	88.5	178		2.97871
2255	2	71.5	1	0	51.7	155	4.65786	5.08804
2256	1	71.7	1	0	99.8	173	7.54273	5.25036
2257	1	72.2	1	0	108.4	183	2.40865	1.57919
2258	1	72.4	1	0	77.1	170	0.532184	3.74853
2259	2	72.5	1	0	77.1	152	4.67043	6.14537
2260	2	72.6	1	0	63.5	170	2.47076	6.7253
2261	2	72.7	1	0	66.2	165	5.27279	5.18953
2262	1	72.7	1	0	89.4	180	3.2244	2.71685
2263	1	73.3	1	0	73.5	168	4.14462	7.65989
2264	1	73.4	1	0	90.7	180	0.778025	4.4198
2265	2	73.6	1	0	77.1	152	4.48443	2.31558
2266	2	73.8	1	0	69.4	155	3.84668	4.81444
2267	2	73.9	1	0	113.4	168	2.14856	1.83087
2268	2	74	1	0	82.6	160	5.46278	6.42401
2269	1	74.1	1	0	102.1	185	5.48421	5.74369
2270	2	74.6	1	0	104.3	155	2.70106	1.68504
2271	2	74.7	1	0	81.6	152	4.28872	7.29392
2272	1	75	1	0	68	175	2.57215	1.0296
2273	2	75.1	1	0	91.2	157	1.76809	2.19582
2274	1	75.6	1	0	117.9	173	2.81223	6.02702
2275	1	75.7	1	0	101.6	193	5.62454	6.94879
2276	1	75.8	1	0	104.3	178	1.0064	0.773534
2277	2	75.8	1	0	54.4	155	0.0579462	0.2964
2278	1	75.8	1	0	61.2	163	2.47237	8.04708
2279	1	76.2	1	0	90.7	183	1.29447	3.82528
2280	2	76.2	1	0	86.2	165	4.03184	2.65114
2281	1	76.4	1	0	85.3	175	1.07522	5.75723
2282	2	76.7	1	0	68	170	5.26749	4.8195
2283	1	77.5	1	0	90.7	175	2.3459	2.13701
2284	1	78	1	0	80.7	188	0.730439	2.20015
2285	1	78.3	1	0	68	173	7.36118	5.58822
2286	2	79.3	1	0	62.6	201	0.401301	2.3465
2287	2	79.3	1	0	55.3	152	1.22704	1.65549
2288	1	80	1	0	81.6	168	3.24123	6.00165
2289	2	80.2	1	0	64.4	175	0.0415657	4.753
2290	2	80.5	1	0	64.4	160	2.53803	2.3253
2291	1	80.9	1	0	90.7	178	2.4476	7.9082
2292	2	81.5	1	0	93.9	168	4.9644	8.71955
2293	1	81.6	1	0	69.9	165	3.67634	6.4676
2294	2	82.7	1	0	62.1	155	3.00054	3.47425
2295	1	86.8	1	0	68	175	2.64578	7.43369

## Sheet: DataDictionary
Variable Name	Question Text		Answer Text				Answer Value
Anonymized ID	Numeric sequental ID
Sex	Sex of participant		Male				1
			Female				2
			Missing				-9999
AgeAtExam	Age at time of study exam
Race	Which group or groups describe your racial background?		White				1
			Black or African American				2
			Asian				3
			Native American or Alaskan Native				5
			Other Race/Multi-Racial				6
			Native Hawaiian or Other Pacific Islander				7
			DK/NA/R				-8888
			Missing				-9999
Ethnicity	Are you Hispanic or of Latino descent?		No				0
			Yes				1
			Not Performed				-4444
			Not Part of Protocol				-5555
			Skipped				-6666
			Don't Know				-8888
			Missing				-9999
Weight_kg	Weight in kilograms		Not Performed				-4444
			Not Part of Protocol				-5555
			Skipped				-6666
			Don't Know				-8888
			Missing				-9999
Height_cm	Height in centimeters		Not Performed				-4444
			Not Part of Protocol				-5555
			Skipped				-6666
			Don't Know				-8888
			Missing				-9999
Right Curvature	Clinodactyly calculation - Right hand
Left Curvature	Clinodactyly calculation - Left hand
